# Supplementary material
Source: Springer Nature journal article supplement (https://www.springermedizin.de/resource/supplementary/12936_2011_2001_MOESM11_ESM.pdf/9543102)
Supplement: MOESM11 [file 9543102]

**Table 3. Association between malaria retinopathy and infections caused by a single/less complex genotypes (vs. 3 or more). Frequencies and odds ratios (OR) obtained in logistic regression models. Four patients were removed from regression modeling due to missing data.**

|                                                                         | Single/Less Complex Genotype<br>(< 3 Het. Calls)<br>(N = 52) | Multiple Genotypes<br>(≥3 Het. Calls)<br>(N = 51) |           |
|-------------------------------------------------------------------------|--------------------------------------------------------------|---------------------------------------------------|-----------|
| Retinopathy                                                             | 42 (81%)                                                     | 27 (53%)                                          |           |
| No retinopathy                                                          | 10                                                           | 24                                                |           |
| <b>Logistic Regression<br/>(N = 67 with and 32 without retinopathy)</b> |                                                              |                                                   |           |
| <b>Unadjusted Model†</b>                                                | <b>OR</b>                                                    | <b>(95% CI)</b>                                   | <b>P*</b> |
| Single/Less Complex (vs. 3 Hets)                                        | 3.7                                                          | (1.51 - 9.10)                                     | 0.003     |
| <b>Adjusted Model†</b>                                                  |                                                              |                                                   |           |
| Single/Less Complex (vs. ≥ 3 Hets)                                      | 4.82                                                         | (1.59 - 14.30)                                    | 0.003     |
| Hematocrit                                                              | 0.84                                                         | (0.79, 0.96)                                      | < 0.0001  |
| Parasites/μl (natural logarithm)                                        | 1.36                                                         | (0.996, 1.85)                                     | 0.046     |
| Time (weeks from January until date of sample collection)               | 0.87                                                         | (0.77 – 0.92)                                     | 0.001     |

Het. = Heterozygous; OR = Odd Ratio; CI = Confidence Interval

\* P-values were estimated using likelihood-ratio tests.

† c-statistic (corresponding to the area under the ROC curve of the fitted model) of the unadjusted model was 0.66 and of the adjusted model was 0.82.
